# Supplementary material for: Reduced brain activity in female patients with non-alcoholic fatty liver disease as measured by near-infrared spectroscopy
Source: PubMed Central journal article supplement (PMC5380307; doi:10.1371/journal.pone.0174169), 2017-04-04
Supplement: pone.0174169.s002.pdf [file pone.0174169.s002.pdf]

|          | age | sex | BMI  | CES-D | sc | VFT | PSQIG | ALT | ALP | TB  |
|----------|-----|-----|------|-------|----|-----|-------|-----|-----|-----|
| NAFLD 01 | 59  | F   | 32.5 | 1     |    | 12  | 1     | 132 | 460 | 1   |
| NAFLD 02 | 53  | F   | 30.7 | 14    |    | 10  | 10    | 119 | 259 | 0.5 |
| NAFLD 03 | 70  | F   | 26.9 | 5     |    | 9   | 4     | 14  | 411 | 0.6 |
| NAFLD 04 | 66  | F   | 24.8 | 5     |    | 12  | 5     | 95  | 228 | 0.7 |
| NAFLD 05 | 63  | F   | 32   | 3     |    | 8   | 0     | 60  | 325 | 1.4 |
| NAFLD 06 | 73  | F   | 26   | 2     |    | 8   | 6     | 53  | 330 | 0.7 |
| NAFLD 07 | 53  | F   | 32.3 | 14    |    | 12  | 9     | 33  | 258 | 0.6 |
| NAFLD 08 | 61  | F   | 29.3 | 1     |    | 12  | 3     | 38  | 268 | 1.4 |
| NAFLD 09 | 48  | F   | 32.7 | 2     |    | 25  | 6     | 63  | 231 | 0.7 |
| NAFLD 10 | 46  | F   | 29.3 | 13    |    | 10  |       | 87  | 211 | 0.7 |
| NAFLD 11 | 60  | F   | 25.9 | 4     |    | 11  | 13    | 34  | 144 | 0.7 |
| NAFLD 12 | 43  | F   | 28.7 | 0     |    | 12  | 1     | 30  | 153 | 0.1 |
| NAFLD 13 | 50  | F   | 22.1 | 15    |    | 9   | 7     | 27  | 299 | 0.5 |
| NAFLD 14 | 40  | F   | 23.7 | 3     |    | 10  | 2     | 17  | 207 | 1   |
| NAFLD 15 | 40  | F   | 29.1 | 9     |    | 13  | 5     | 115 | 269 | 0.9 |
| NAFLD 16 | 52  | F   | 28.1 | 3     |    | 10  | 6     | 46  | 290 | 0.1 |
| NAFLD 17 | 47  | F   | 32.3 | 24    |    | 21  | 6     | 41  | 169 | 0.6 |
| NAFLD 18 | 43  | F   | 34   | 3     |    | 15  | 6     | 52  | 296 | 1.9 |
| NAFLD 19 | 62  | F   | 28.6 | 9     |    | 18  | 4     | 59  | 333 | 0.7 |
| NAFLD 20 | 57  | F   | 25.4 | 0     |    | 7   | 2     | 27  | 297 | 0.8 |
| NAFLD 21 | 61  | F   | 22.8 | 7     |    | 14  | 6     | 53  | 295 | 1.3 |
| NAFLD 22 | 63  | F   | 24.3 | 0     |    | 11  | 5     | 24  | 157 | 1   |
| NAFLD 23 | 55  | F   | 32   | 0     |    | 16  | 3     | 24  | 238 | 0.9 |
| NAFLD 24 | 36  | F   | 32.4 | 9     |    | 17  |       | 61  | 167 | 0.7 |
| NC01     | 59  | F   | 22.6 | 6     |    | 13  | 9     |     |     |     |
| NC02     | 57  | F   |      | 0     |    | 12  |       |     |     |     |
| NC03     | 42  | F   | 21.9 | 5     |    | 14  | 9     |     |     |     |
| NC04     | 55  | F   | 26.6 | 17    |    | 14  | 9     |     |     |     |
| NC05     | 50  | F   | 16.8 | 2     |    | 12  | 4     |     |     |     |
| NC06     | 47  | F   | 18.5 | 6     |    | 15  | 6     |     |     |     |
| NC07     | 48  | F   | 20.1 | 3     |    | 23  | 6     |     |     |     |
| NC08     | 44  | F   | 20.3 | 4     |    | 16  | 1     |     |     |     |
| NC09     | 56  | F   | 18.8 | 0     |    | 15  | 1     |     |     |     |
| NC10     | 52  | F   | 20.1 | 0     |    | 21  | 1     |     |     |     |
| NC11     | 47  | F   | 18.3 | 1     |    | 14  | 2     |     |     |     |
| NC12     | 51  | F   | 21.4 | 6     |    | 27  | 6     |     |     |     |

|      |    |   |      |    |    |   |
|------|----|---|------|----|----|---|
| NC13 | 51 | F | 27   | 0  | 7  | 2 |
| NC14 | 51 | F | 18.5 | 12 | 11 | 7 |
| NC15 | 51 | F | 20   | 4  | 18 | 2 |

**NIRS**

NAFLD

Type:1

Pre 10s:

Name

Hb:Oxy

|          | ch1       | ch2      | ch3      | ch4      | ch5       | ch6      | ch7      | ch8      | ch9      |
|----------|-----------|----------|----------|----------|-----------|----------|----------|----------|----------|
| NAFLD 01 | -0.000726 | -2.7E-05 | .        | -0.00263 | -0.000263 | -0.00094 | -0.00197 | -0.00172 | -0.00129 |
| NAFLD 02 | 0.001313  | 0.001015 | .        | -2.3E-05 | -0.00022  | 0.004031 | 0.002148 | 0.001864 | 0.000506 |
| NAFLD 03 | -0.002383 | -0.00439 | .        | -0.00038 | -0.000465 | -0.00124 | -0.00122 | -0.00159 | -0.00095 |
| NAFLD 04 | 0.004017  | 0.001679 | 0.002181 | 0.000661 | 0.001303  | -0.00038 | -0.00211 | -0.00044 | 0.001395 |
| NAFLD 05 | 0.001635  | -0.00134 | .        | 0.001336 | 0.000644  | -0.00143 | -0.00155 | 0.000898 | 0.000706 |
| NAFLD 06 | 0.001014  | -0.00041 | 0.001531 | -1.6E-05 | 0.000154  | 0.000652 | 0.000732 | 0.0008   | 0.003224 |
| NAFLD 07 | -0.002566 | -7.8E-05 | -0.00257 | 0.000771 | -0.000022 | 0.000126 | .        | 0.000234 | .        |
| NAFLD 08 | .         | 0.00019  | 0.000568 | -0.00087 | 0.000033  | -0.00256 | -0.02174 | -0.00198 | -0.00151 |
| NAFLD 09 | -0.000154 | -0.00392 | 0.002257 | -0.00158 | -0.002469 | 0.000018 | -0.00239 | 0.002151 | -0.00058 |
| NAFLD 10 | .         | -0.03163 | .        | .        | -0.004607 | 0.002582 | -0.01273 | -0.00871 | -0.00217 |
| NAFLD 11 | .         | .        | -0.00347 | -0.00066 | -0.000196 | -0.00093 | -9.1E-05 | -0.00042 | 0.00313  |
| NAFLD 12 | .         | .        | 0.000983 | 0.000477 | -0.001679 | -0.00085 | -0.00226 | -0.00089 | -0.0012  |
| NAFLD 13 | .         | .        | .        | .        | .         | 0.001746 | .        | .        | .        |
| NAFLD 14 | -0.003378 | -0.00561 | -0.00211 | 0.000764 | -0.00073  | -0.00414 | -0.01013 | -0.0011  | -0.0069  |
| NAFLD 15 | -0.001265 | 0.003883 | 0.01889  | 0.006686 | 0.002627  | 0.000741 | -0.00038 | 0.001004 | 0.00406  |
| NAFLD 16 | .         | .        | -0.00165 | 0.002049 | .         | .        | .        | .        | .        |
| NAFLD 17 | -0.000689 | -0.00236 | -0.00071 | -6.6E-05 | 0.000262  | 0.000095 | 0.002141 | 0.000722 | -0.00103 |
| NAFLD 18 | -0.001413 | -0.00257 | -0.00074 | -0.00071 | -0.001286 | -0.0014  | -0.0005  | .        | .        |
| NAFLD 19 | -0.004595 | -4.8E-05 | -0.00111 | -0.00195 | -0.00286  | -0.00279 | -0.00127 | -0.00102 | -0.00149 |
| NAFLD 20 | .         | .        | .        | .        | .         | .        | 0.001021 | .        | 0.003935 |
| NAFLD 21 | 0.000313  | 0.002479 | 0.004931 | 0.003209 | 0.002223  | 0.002399 | 0.006477 | 0.005098 | 0.004268 |
| NAFLD 22 | .         | .        | .        | 0.003304 | .         | .        | 0.001231 | -0.00207 | .        |
| NAFLD 23 | .         | .        | .        | -0.00287 | -0.001578 | -0.00127 | -0.0032  | -0.00053 | -0.00022 |
| NAFLD 24 | -0.001363 | .        | 0.000878 | -0.00254 | -0.002503 | -0.00375 | -0.00373 | -0.00262 | -0.00295 |

Task1 60.0s

Name

|          | ch1       | ch2      | ch3 | ch4      | ch5       | ch6      | ch7      | ch8     | ch9      |
|----------|-----------|----------|-----|----------|-----------|----------|----------|---------|----------|
| NAFLD 01 | -0.029272 | -0.17545 | .   | 0.034567 | -0.024298 | 0.020919 | -0.09428 | -0.2079 | -0.02559 |

|          |           |          |          |          |           |          |          |          |          |
|----------|-----------|----------|----------|----------|-----------|----------|----------|----------|----------|
| NAFLD 02 | 0.027381  | 0.024268 |          | 0.059658 | 0.183475  | 0.268799 | 0.247467 | 0.11215  | 0.223794 |
| NAFLD 03 | 0.16985   | 0.16738  |          | 0.305743 | 0.213766  | 0.001179 | -0.00076 | 0.032442 | 0.10454  |
| NAFLD 04 | 0.220065  | 0.078876 | 0.085581 | 0.102426 | 0.120693  | 0.069746 | -0.04433 | 0.04963  | 0.095914 |
| NAFLD 05 | 0.480924  | -0.05501 |          | 0.027356 | 0.049163  | -0.18175 | 0.069187 | 0.30011  | 0.26125  |
| NAFLD 06 | 0.013487  | 0.032559 | 0.077507 | 0.064032 | 0.028193  | 0.021591 | 0.019577 | 0.050392 | 0.025028 |
| NAFLD 07 | 0.180756  | -0.52045 | -0.82438 | -0.35769 | -0.131696 | -0.1751  |          | -0.13532 |          |
| NAFLD 08 |           | -0.04875 | -0.18853 | -0.29708 | -0.111642 | -0.102   | -0.04202 | -0.0746  | 0.053175 |
| NAFLD 09 | 0.21174   | 0.16206  | 0.313319 | 0.005429 | -0.025954 | 0.112265 | -0.16088 | -0.17249 | -0.21949 |
| NAFLD 10 |           | -0.17088 |          |          | 0.011846  | -0.06046 | -0.01085 | -0.01238 | 0.111281 |
| NAFLD 11 |           |          | -0.13786 | 0.07527  | 0.054903  | 0.05989  | 0.056742 | 0.070518 | 0.193933 |
| NAFLD 12 |           |          | -0.11149 | 0.127885 | 0.014588  | 0.027153 | 0.040875 | -0.17644 | -0.08197 |
| NAFLD 13 |           |          |          |          |           | -0.16049 |          |          |          |
| NAFLD 14 | 0.213545  | 0.059676 | 0.016636 | -0.09491 | -0.118218 | -0.03883 | -0.00031 | 0.044827 | -0.16699 |
| NAFLD 15 | 0.094238  | -0.00307 | -0.2428  | -0.34814 | -0.103246 | -0.05083 | -0.03306 | 0.004967 | 0.004457 |
| NAFLD 16 |           |          | 0.11311  | 0.250129 |           |          |          |          |          |
| NAFLD 17 | -0.116402 | -0.00979 | 0.043118 | 0.073256 | 0.040373  | 0.037244 | -0.04133 | -0.04909 | -0.1127  |
| NAFLD 18 | 0.114508  | 0.178123 | 0.232141 | 0.097024 | 0.079525  | 0.122224 | 0.163857 |          |          |
| NAFLD 19 | -0.14564  | -0.15347 | -0.05534 | -0.0049  | 0.020615  | -0.02967 | -0.04874 | -0.02449 | -0.0531  |
| NAFLD 20 |           |          |          |          |           |          | 0.215703 |          | 0.236534 |
| NAFLD 21 | -0.032681 | 0.103767 | 0.301356 | 0.137799 | 0.097456  | 0.040465 | 0.00898  | 0.040331 | -0.05293 |
| NAFLD 22 |           |          |          | -0.00597 |           |          | 0.085391 | -0.1089  |          |
| NAFLD 23 |           |          |          | -0.27306 | -0.220691 | -0.01283 | 0.027673 | -0.11678 | -0.19467 |
| NAFLD 24 | -0.544077 |          | -0.08889 | -0.18293 | -0.079341 | -0.06343 | -0.0863  | -0.05716 | 0.022396 |

Healthy control

Type:2

Pre 10s:

| Name | Hb:Oxy    |          |          |          |     |           |          |          |          |
|------|-----------|----------|----------|----------|-----|-----------|----------|----------|----------|
|      | ch1       | ch2      | ch3      | ch4      | ch5 | ch6       | ch7      | ch8      | ch9      |
| NC01 | -0.003397 | 0.002743 | 0.001134 | 0.003496 |     | 0.00165   | 0.000615 | -0.00181 |          |
| NC02 | -0.000595 | 0.00158  | -0.00024 | 0.001441 |     | 0.000336  | 0.000605 | 0.000221 | -0.00074 |
| NC03 | 0.001001  |          |          | 0.002524 |     | 0.002524  | 0.00031  |          | 0.003458 |
| NC04 | 0.000295  | -0.00117 |          | -0.00303 |     |           |          | -0.00202 | -0.00203 |
| NC05 | -0.007157 | -0.00409 | -0.00252 | -0.00105 |     | -0.001347 | -0.00274 | -0.00541 | -0.00112 |
| NC06 | 0.000428  | -0.00765 | 0.000341 |          |     | 0.002072  | 0.000545 | -0.00058 | 0.00061  |
| NC07 | -0.008922 | -0.0006  | -0.00041 | -0.00029 |     | -0.000269 | 0.00058  | 0.000386 | -0.00135 |
| NC08 | -0.001523 |          | -0.00117 | -0.00544 |     | -0.000018 | -0.00054 | -0.00197 | -0.00269 |
| NC09 | 0.000071  | -0.00159 | 0.000694 | -0.00047 |     | -0.001344 | -0.00076 | -0.00054 |          |
| NC10 | -0.004298 | -0.00287 | 0.000095 | 0.000127 |     | -0.000141 | -0.00057 | -0.00014 | 0.002198 |

|      |           |          |          |          |           |          |          |          |          |
|------|-----------|----------|----------|----------|-----------|----------|----------|----------|----------|
| NC11 | 0.002486  | 0.007258 | -0.00162 | -0.00452 | -0.001692 | -0.0009  | -0.00195 | -0.00178 | -0.00408 |
| NC12 | -0.000978 | -0.00101 | -0.00158 | -0.00169 | 0.000464  | 0.000237 | -0.00187 | -0.00013 | -0.00023 |
| NC13 | 0.001491  | 0.001074 | 0.000981 | 0.003658 | 0.001398  | 0.001826 | 0.011059 | 0.006596 | 0.005246 |
| NC14 | -0.00101  | 0.000223 | 0.002581 | -0.00118 | -0.002969 | -0.00235 | -0.00193 | -0.00036 | -0.00115 |
| NC15 | -0.001385 | -0.00109 | -1.1E-05 | 0.006363 | 0.00396   | 0.004199 | .        | .        | -0.00693 |

Task1 60.0s:  
Name

|      | ch1       | ch2      | ch3      | ch4      | ch5       | ch6      | ch7      | ch8      | ch9      |
|------|-----------|----------|----------|----------|-----------|----------|----------|----------|----------|
| NC01 | 0.00117   | 0.047493 | 0.057432 | 0.182237 | 0.121383  | 0.06654  | 0.10771  | .        | .        |
| NC02 | -0.089505 | -0.18873 | -0.08851 | 0.090762 | -0.109699 | -0.05526 | 0.0558   | 0.008045 | .        |
| NC03 | -0.072516 | .        | .        | 0.254787 | -0.238682 | -0.40981 | .        | -0.48917 | .        |
| NC04 | 0.030057  | -0.04798 | .        | 0.216294 | .         | .        | 0.105469 | 0.062381 | .        |
| NC05 | 0.112425  | 0.226301 | 0.168208 | 0.078121 | 0.068065  | 0.066671 | 0.065436 | 0.096521 | .        |
| NC06 | 0.316871  | 0.269009 | 0.158748 | .        | -0.202053 | 0.092235 | 0.055283 | 0.088851 | .        |
| NC07 | 0.000426  | -0.11366 | -0.07673 | 0.009436 | 0.021797  | -0.00032 | 0.01943  | 0.00306  | 0.031717 |
| NC08 | 0.056666  | .        | -0.14882 | -0.27533 | -0.229747 | -0.04917 | -0.09737 | 0.00618  | -0.09258 |
| NC09 | 0.271504  | 0.539786 | 0.057708 | -0.45329 | 0.14096   | -0.01368 | -0.08336 | .        | 0.47824  |
| NC10 | -0.059481 | -0.09343 | 0.049516 | 0.034622 | -0.04005  | -0.07056 | 0.001621 | 0.034028 | -0.0514  |
| NC11 | 0.237091  | 0.323498 | 0.108107 | 0.133289 | -0.010297 | -0.01569 | 0.038857 | 0.068034 | 0.137958 |
| NC12 | -0.108649 | -0.10333 | -0.05504 | -0.02343 | -0.058513 | -0.05254 | 0.065051 | 0.006047 | -0.00488 |
| NC13 | 0.0721    | 0.069879 | 0.129494 | 0.080097 | -0.005207 | -0.03014 | -0.11275 | -0.03007 | -0.07444 |
| NC14 | 0.01248   | 0.057717 | 0.141145 | 0.023626 | -0.030556 | -0.03597 | -0.09319 | 0.003186 | 0.042984 |
| NC15 | -0.045524 | -0.04435 | -0.07835 | -0.05999 | -0.020763 | -0.02725 | .        | .        | -0.18936 |

| TG  | HDL | LDL | Ferritin | glu | A1c | FIB4 |
|-----|-----|-----|----------|-----|-----|------|
| 98  | 69  | 121 | 227      | 135 | 6.4 | 2.04 |
| 125 | 43  | 82  | 183      | 204 |     | 2.78 |
| 77  |     | 95  |          | 96  | 5.5 | 3.28 |
| 120 | 48  | 131 | 223      | 141 |     |      |
| 137 | 58  | 118 | 169      | 96  | 6.5 | 1.82 |
| 136 | 52  | 164 |          | 114 | 5.9 | 3.11 |
| 180 | 59  | 80  | 71       | 94  | 5.4 | 0.98 |
| 49  | 54  | 177 | 351      | 75  | 5.2 | 1.31 |
| 140 | 49  | 131 |          | 120 | 6.1 | 1.01 |
| 112 | 76  | 107 | 266      | 89  | 5.6 | 1    |
| 74  | 64  | 131 | 174      | 127 | 6.8 | 1.27 |
| 146 | 28  | 97  | 24       | 107 | 5.7 | 0.5  |
| 82  | 61  | 171 | 62       | 102 | 6   | 0.71 |
| 233 | 60  | 92  | 56       | 97  | 5.5 | 0.44 |
| 158 | 33  | 66  | 39       | 130 | 8.5 | 0.68 |
| 99  | 51  | 89  | <10      | 100 | 5.2 | 1.68 |
| 113 | 50  | 172 |          | 157 | 9.3 | 0.72 |
| 39  | 45  | 66  | 86       | 107 | 5.5 | 2.3  |
| 139 | 66  | 122 | 237      | 133 | 7.4 | 1.22 |
| 139 | 44  | 109 | 97       | 117 | 6.4 | 1.1  |
| 65  | 62  | 103 |          |     |     | 2.56 |
| 123 | 47  | 100 |          | 114 | 6.1 | 1.42 |
| 158 | 48  | 160 | 114      | 109 | 6.7 | 1.33 |
| 48  | 42  | 87  | 51       | 96  | 5.2 | 0.6  |

| ch10     | ch11     | ch12     | ch13     | ch14     | ch15     | ch16     | ch17     | ch18     | ch19     | ch20     | ch21     | ch22     | ch23     |
|----------|----------|----------|----------|----------|----------|----------|----------|----------|----------|----------|----------|----------|----------|
| -0.00165 | -0.00331 | -0.00387 | .        | -0.00642 | 0.000961 | -0.00213 | -0.00125 | -0.00211 | -0.00292 | -0.00264 | -0.00126 | -0.00474 | -0.00352 |
| -0.00051 | -0.0014  | 0.002669 | .        | .        | .        | 0.002002 | 0.001988 | 0.000515 | .        | -0.00071 | -0.00152 | 0.001015 | -0.00027 |
| 0.00203  | 0.006218 | -0.00069 | .        | -0.00547 | -0.00076 | 0.000512 | -0.0001  | -0.00126 | -0.00289 | -0.00285 | 0.00119  | -0.01465 | 0.012843 |
| 0.001122 | 0.003006 | 0.005403 | 0.002889 | 0.002084 | 0.002216 | 0.000992 | 0.001563 | -0.00091 | 0.001601 | 0.000823 | 0.001319 | 0.002072 | .        |
| -0.00144 | 0.00302  | -0.00147 | -0.00235 | -0.00324 | 0.001441 | -0.00094 | -0.00013 | -0.00052 | 0.001089 | 0.000456 | 0.000348 | 0.000625 | -0.00055 |
| -0.00064 | 0.000517 | -0.00145 | 0.000303 | 0.000655 | 0.00091  | 0.00053  | 0.000649 | 0.000993 | 0.000243 | 0.001175 | 0.000218 | 0.000155 | 0.000513 |
| -0.00075 | -0.00188 | -0.00216 | -0.00301 | -0.00197 | -0.00176 | -0.00176 | -0.00236 | -0.00085 | .        | -0.00112 | -0.00199 | -0.0009  | -0.0023  |
| .        | -0.00135 | .        | 0.001336 | .        | -0.00108 | -0.0001  | 0.002317 | -0.00606 | -0.002   | .        | -0.00091 | -0.00268 | -0.0061  |
| 0.000733 | -0.00428 | .        | .        | 0.000692 | 0.002652 | -0.00146 | -0.01214 | 0.003542 | 0.000859 | 0.00238  | 0.000629 | 0.000124 | 0.004113 |
| .        | .        | .        | -0.02681 | .        | -0.01103 | -0.01114 | -0.0044  | -0.00227 | -0.00078 | -0.00033 | -0.002   | -0.00182 | -0.00258 |
| 0.002678 | -0.00137 | -0.00354 | .        | -0.00205 | -0.00093 | -0.00093 | -0.00016 | -0.00046 | 0.002085 | 0.003442 | 0.002221 | -0.001   | .        |
| .        | .        | .        | .        | -0.00131 | 0.000054 | -0.00074 | -0.00158 | -0.00067 | 0.00033  | -0.00244 | .        | 0.003275 | 0.002238 |
| .        | .        | .        | .        | -0.00232 | .        | .        | .        | .        | .        | .        | .        | -0.00392 | -0.00237 |
| .        | -0.00309 | -0.00318 | -0.00292 | 0.000306 | 0.00497  | -0.00023 | -0.00433 | -0.00265 | .        | -0.00361 | .        | .        | .        |
| 0.000902 | -0.00109 | -0.00285 | -0.00095 | 0.006061 | -0.00251 | 0.001356 | -0.00396 | 0.000614 | -0.00507 | -0.00619 | -0.00771 | -0.00212 | 0.00144  |
| .        | 0.004013 | -0.00057 | -0.00825 | -0.00101 | 0.001572 | -6.2E-05 | 0.001075 | .        | -0.00337 | .        | .        | .        | .        |
| -0.00292 | -0.00199 | 0.000571 | -0.00103 | -0.00021 | 0.000823 | -0.00068 | -0.00075 | -0.00039 | 0.000998 | -0.00248 | -0.00289 | -0.00055 | .        |
| .        | .        | .        | 0.00148  | 0.002556 | 0.001153 | -0.0005  | -0.00389 | .        | .        | -0.00019 | .        | .        | .        |
| -0.00102 | -0.00247 | 0.000792 | 0.000086 | -0.00414 | -0.00381 | -0.004   | -0.00337 | -0.0027  | -0.00174 | -0.00125 | -0.00078 | 0.002844 | 0.00057  |
| .        | .        | .        | .        | 0.004484 | 0.001669 | 0.000946 | 0.000431 | .        | 0.001764 | .        | .        | .        | .        |
| 0.001607 | -0.00309 | 0.012945 | 0.008628 | 0.00124  | 0.001871 | 0.000092 | 0.001322 | 0.005931 | 0.005951 | -0.00165 | -0.00232 | 0.01255  | .        |
| .        | -0.0005  | .        | .        | .        | 0.010462 | .        | .        | 0.004735 | 0.000116 | -0.00242 | -0.00094 | .        | .        |
| -0.00221 | .        | .        | .        | -0.00121 | -0.0018  | 0.001492 | -0.00138 | -0.00177 | 0.000887 | 0.000044 | 0.000558 | .        | -0.0002  |
| -0.00518 | -0.0016  | .        | 0.000666 | -0.00109 | -8.6E-05 | -0.00037 | -0.00244 | -0.00151 | -0.00356 | -0.00187 | -0.00404 | -0.00013 | -0.00092 |

| ch10     | ch11     | ch12     | ch13 | ch14     | ch15     | ch16     | ch17     | ch18   | ch19     | ch20     | ch21     | ch22     | ch23     |
|----------|----------|----------|------|----------|----------|----------|----------|--------|----------|----------|----------|----------|----------|
| 0.090623 | 0.442458 | 0.061336 | .    | 0.063143 | 0.007431 | 0.034529 | -0.03285 | 0.1099 | -0.02285 | -0.06329 | 0.105399 | 0.299343 | 0.166895 |

|          |          |          |          |          |          |          |          |          |          |          |          |          |          |
|----------|----------|----------|----------|----------|----------|----------|----------|----------|----------|----------|----------|----------|----------|
| 0.163139 | 0.161164 | 0.248252 |          |          |          | 0.094956 | 0.140334 | 0.137034 |          | 0.220013 | 0.217399 | 0.421256 | 0.469681 |
| 0.094145 | 0.081561 | 0.221286 |          | 0.477591 | 0.258013 | 0.329084 | 0.137615 | 0.159064 | 0.237034 | 0.19452  | 0.151198 | 0.104794 | 0.426133 |
| 0.195593 | 0.135523 | 0.282964 | 0.141015 | 0.12793  | 0.169496 | 0.163053 | 0.151902 | 0.134627 | 0.248213 | 0.394626 | 0.255366 | 0.198344 |          |
| 0.108504 | 0.300968 | 0.23696  | 0.03137  | -0.00226 | 0.084469 | 0.061498 | 0.179761 | 0.14938  | 0.460587 | 0.228941 | 0.255536 | 0.447042 | 0.276601 |
| 0.023525 | 0.020467 | 0.025334 | 0.024485 | 0.050878 | 0.022169 | 0.043507 | 0.031884 | 0.06566  | 0.045301 | 0.029339 | 0.039255 | -0.01818 | 0.026553 |
| 0.209908 | 0.107593 | -0.10071 | -0.82563 | -0.3759  | 0.318116 | -0.05579 | 0.124619 | -0.06358 |          | 0.263881 | 0.284979 | 0.159743 | 0.022429 |
|          | -0.22622 |          | -0.13594 |          | -0.20438 | -0.08732 | -0.01766 | -0.01327 | -0.03674 |          | 0.014563 | -0.20608 | -0.39786 |
| 0.217008 | 0.011182 |          |          | -0.05741 | 0.029912 | -0.04496 | 0.105041 | 0.32664  | -0.1422  | 0.00859  | 0.080787 | 0.072566 | 0.062167 |
|          |          |          | 0.0637   |          | -0.01006 | 0.036994 | -0.05401 | 0.055323 | 0.087503 | 0.294576 | -0.04685 | -0.3374  | -0.20458 |
| 0.154517 | 0.158863 | 0.150286 |          | -0.05394 | 0.085629 | 0.120546 | 0.111375 | 0.073213 | -0.03334 | 0.288958 | 0.184496 | 0.206536 |          |
|          |          |          |          | -0.07027 | 0.119387 | -0.04152 | 0.087334 | 0.072597 | -0.17218 | -0.05118 |          | 0.037155 | -0.0521  |
|          |          |          |          | 0.090601 |          |          |          |          |          |          |          | 0.202232 | 0.039665 |
|          | 0.216529 | 0.276361 | 0.17787  | 0.032775 | -0.01587 | -0.04499 | -0.01204 | 0.09124  |          | 0.009497 |          |          |          |
| -0.0763  | 0.059984 | 0.221633 | -0.0737  | -0.12319 | -0.22199 | -0.08421 | 0.017177 | -0.06559 | 0.01831  | 0.14765  | 0.003593 | 0.110633 | 0.118727 |
|          | 0.013266 | 0.269596 | 0.196024 | 0.136957 | 0.133505 | 0.026529 | 0.022483 |          | -0.06085 |          |          |          |          |
| -0.17033 | 0.124565 | -0.00791 | 0.136803 | 0.024831 | 0.032404 | 0.051646 | 0.094466 | -0.06573 | -0.07618 | 0.015496 | -0.05431 | 0.187701 |          |
|          |          |          | 0.224586 | 0.020474 | 0.133968 | 0.035392 | 0.102766 |          |          | 0.180543 |          |          |          |
| -0.05487 | -0.0726  | -0.15604 | -0.17807 | -0.10286 | -0.05452 | -0.05718 | -0.03499 | -0.10833 | -0.05025 | -0.0567  | -0.22244 | -0.12797 | -0.13862 |
|          |          |          |          | -0.04918 | -0.11514 | -0.24555 | -0.18239 |          | 0.14969  |          |          |          |          |
| -0.03849 | 0.016783 | 0.068524 | 0.091817 | 0.112516 | 0.068306 | 0.07759  | 0.052394 | 0.050905 | 0.095756 | 0.013846 | 0.027219 | -0.01803 |          |
|          | -0.283   |          |          |          | 0.110793 |          |          | 0.295242 | 0.075024 | 0.011881 | 0.015497 |          |          |
| -0.10012 |          |          |          | -0.11355 | -0.08873 | 0.096873 | -0.03134 | -0.02592 | -0.09986 | 0.262809 | 0.144457 |          | -0.29553 |
| -0.02289 | -0.26215 |          | -0.13651 | -0.28364 | -0.07633 | -0.0383  | 0.009844 | -0.02668 | -0.03403 | 0.036852 | -0.04979 | -0.21046 | -0.19143 |

| ch10     | ch11     | ch12     | ch13     | ch14     | ch15     | ch16     | ch17     | ch18     | ch19     | ch20     | ch21     | ch22     | ch23     |
|----------|----------|----------|----------|----------|----------|----------|----------|----------|----------|----------|----------|----------|----------|
| -0.00159 | -0.00125 | 0.001985 |          | 0.001496 | 0.00127  | 0.002779 | 0.002087 | -0.00368 |          | -0.00042 | -0.00031 | -0.00107 | -0.00157 |
|          | -0.00225 | 0.007045 | 0.000216 | 0.000433 | -0.00276 | -0.00016 | 0.000192 | -8.9E-05 | -0.00064 | 0.001702 | -0.02023 | 0.001284 | 0.005643 |
| 0.006649 | 0.004099 |          | 0.000086 |          | 0.004115 | 0.003359 | 0.005741 |          | 0.008612 | 0.009751 | 0.003512 | 0.007382 | 0.011322 |
| -0.00138 | 0.000833 | -0.00035 |          | -0.00086 |          | -0.00043 | -0.00114 | -0.00034 | -0.00115 | -0.00013 | 0.000079 | -0.00267 |          |
|          | -0.00206 |          | -0.0028  | -0.00085 | 0.000496 | -0.00025 | -0.00052 | -0.00063 | -3.4E-05 |          | -0.00282 |          |          |
| -0.0025  | -0.00012 |          | 0.001068 | 0.000819 |          | 0.0011   | 0.002223 | 0.000352 | -0.00056 | 0.000752 | -0.00131 |          |          |
| -0.00445 | 0.00414  |          | -0.00087 | -0.00249 | 0.00148  | 0.000709 | -0.00025 | 0.000552 | -0.00113 | 0.001979 | 0.000378 |          |          |
| -0.00439 | -0.00187 | -0.00088 | -0.00465 | -0.00289 |          | -0.00106 | -0.00063 | -0.00298 | -0.00407 | 0.005038 | -0.00041 | -0.00404 |          |
| -0.00169 | 0.000218 | 0.001345 | 0.002265 | 0.001258 | -0.00183 | -0.00361 | -0.0007  | -0.00158 |          | 0.000547 | -0.00151 | 0.001886 | 0.002737 |
| -0.00142 | -0.00432 | -0.00135 | 0.000181 | 0.000881 | 0.000501 | 0.000097 | 0.001365 | -0.00065 | 0.004667 | 0.003468 | -0.00253 | 0.002226 | 0.002805 |

|          |          |          |          |          |          |          |          |          |          |          |          |          |          |
|----------|----------|----------|----------|----------|----------|----------|----------|----------|----------|----------|----------|----------|----------|
| -0.00117 | -0.00074 | 0.001656 | 0.006235 | 0.001937 | 0.000524 | 0.000452 | -0.00199 | 0.00106  | -0.0007  | -0.00399 | -0.00147 | 0.00375  | 0.004719 |
| .        | -0.00285 | -0.00195 | -7.7E-05 | 0.000308 | -0.00083 | 0.000578 | -0.0007  | -0.00191 | 0.001548 | -0.00123 | .        | -0.00037 | 0.000044 |
| .        | 0.000314 | 0.001789 | 0.002298 | 0.003652 | 0.002274 | 0.002721 | 0.002172 | 0.002927 | 0.006412 | 0.00125  | .        | 0.002019 | 0.004114 |
| -0.00083 | -0.00101 | -0.00193 | 0.00094  | 0.000406 | -0.0018  | 0.000347 | -0.00233 | -0.00033 | -0.00298 | 0.000687 | -0.00087 | 0.000395 | -0.00199 |
| -0.00337 | -0.00099 | 0.00184  | -0.00361 | 0.002469 | 0.000343 | 0.001355 | -0.00077 | .        | -0.0037  | -0.00185 | -0.0038  | .        | -0.00303 |

| ch10     | ch11     | ch12     | ch13     | ch14     | ch15     | ch16     | ch17     | ch18     | ch19     | ch20     | ch21     | ch22     | ch23     |
|----------|----------|----------|----------|----------|----------|----------|----------|----------|----------|----------|----------|----------|----------|
| 0.261924 | 0.089214 | 0.077016 | .        | 0.182664 | 0.185277 | 0.127524 | 0.046208 | 0.283565 | .        | 0.102052 | 0.206199 | 0.062086 | -0.08532 |
| .        | 0.017235 | -0.09343 | -0.09233 | -0.06123 | -0.11806 | -0.02887 | 0.011514 | 0.258794 | 0.235293 | 0.249048 | 0.016719 | 0.224778 | 0.186271 |
| 0.060434 | -0.11126 | .        | -0.08884 | .        | 0.411822 | 0.263995 | -0.45184 | .        | -0.19704 | 0.320373 | 0.079633 | 0.380435 | 0.700643 |
| 0.079886 | 0.255439 | -0.0098  | .        | 0.133229 | .        | 0.013201 | 0.209561 | 0.21612  | 0.097775 | 0.225364 | 0.039079 | 0.249095 | .        |
| .        | 0.161169 | .        | 0.188409 | 0.134755 | 0.125376 | 0.209937 | 0.158828 | 0.237088 | 0.306872 | .        | 0.15675  | .        | .        |
| 0.007916 | 0.148748 | .        | 0.138713 | 0.164401 | .        | 0.150072 | 0.07552  | 0.050806 | 0.249476 | 0.076745 | -0.02491 | .        | .        |
| 0.15591  | 0.082546 | .        | -0.13191 | -0.03431 | 0.071069 | 0.123304 | 0.066923 | 0.111337 | 0.017956 | 0.211218 | 0.21579  | .        | .        |
| -0.09803 | 0.054789 | 0.055946 | -0.11897 | -0.02954 | .        | 0.068337 | -0.04579 | -0.02946 | -0.00453 | -0.12272 | 0.033515 | 0.083867 | .        |
| -0.06595 | -0.0524  | 0.112518 | 0.265828 | -0.36008 | -0.19235 | 0.055489 | 0.102366 | -0.07875 | .        | 0.156656 | 0.02693  | -0.12916 | -0.05558 |
| 0.059063 | 0.091415 | -0.04613 | -0.04883 | 0.024295 | 0.101098 | -0.04501 | 0.141697 | 0.024642 | -0.18193 | 0.162345 | 0.000671 | 0.11699  | 0.065875 |
| 0.167386 | 0.118518 | 0.246551 | 0.102554 | 0.145117 | 0.093674 | 0.06229  | 0.086917 | 0.163269 | 0.339337 | 0.195931 | 0.27013  | 0.226467 | 0.126161 |
| .        | -0.05905 | 0.02438  | -0.02721 | 0.05092  | 0.002396 | -0.05963 | 0.064801 | 0.042633 | 0.071992 | 0.076519 | .        | 0.035584 | 0.20444  |
| .        | 0.133279 | 0.072621 | 0.093666 | 0.09803  | 0.029078 | 0.012271 | 0.037394 | 0.133713 | -0.0491  | 0.050539 | .        | 0.159384 | 0.074007 |
| 0.034207 | 0.024627 | 0.020769 | 0.075682 | 0.07539  | 0.102259 | 0.205344 | 0.007669 | 0.008441 | 0.019018 | 0.02564  | 0.105409 | 0.109982 | 0.226555 |
| -0.10663 | -0.05118 | 0.123003 | -0.06017 | -0.11202 | -0.06441 | -0.07083 | -0.04326 | .        | -0.1486  | -0.04313 | -0.14004 | .        | 0.178511 |





| ch24     | ch25     | ch26     | ch27     | ch28     | ch29     | ch30     | ch31     | ch32     | ch33     | ch34     | ch35     | ch36     | ch37     |
|----------|----------|----------|----------|----------|----------|----------|----------|----------|----------|----------|----------|----------|----------|
| -0.0019  | -0.00248 | -0.00109 | -0.00187 | -0.00096 | -0.00319 | -0.00615 | -0.00199 | -0.00272 | -0.00543 | 0.004738 | -0.00451 | -0.0002  | -0.00081 |
| .        | 0.000271 | 0.004151 | 0.000126 | .        | 0.002687 | 0.000419 | -0.00036 | -0.00021 | 0.000404 | -0.00026 | 0.00385  | 0.003869 | 0.001978 |
| .        | 0.000232 | 0.001308 | 0.00131  | 0.004779 | 0.002508 | -0.01722 | -0.00954 | .        | .        | -0.00173 | -0.00128 | 0.001274 | 0.000756 |
| 0.003773 | 0.004295 | 0.001676 | 0.001774 | 0.002463 | 0.002126 | 0.00004  | 0.000556 | -0.00221 | .        | .        | 0.004293 | 0.002149 | -0.00088 |
| -0.00693 | .        | -1.1E-05 | 0.00023  | 0.000929 | 0.002317 | 0.001143 | 0.001193 | 0.001202 | -0.00196 | -0.00098 | 0.002518 | 0.001634 | .        |
| 0.000834 | 0.000998 | 0.000279 | 0.000331 | -2.8E-05 | 0.001449 | 0.002493 | 0.000617 | 0.000143 | 0.001377 | 0.001212 | 0.00216  | 0.000175 | 0.001661 |
| -0.00444 | -0.00332 | -0.00303 | -0.00176 | -0.0036  | -0.00187 | -0.00306 | -0.00194 | -0.00364 | -0.0024  | -0.00086 | -0.00405 | -0.00283 | -0.00353 |
| 0.001145 | 0.001068 | 0.00169  | 0.00129  | 0.001995 | 0.001222 | -0.0025  | 0.003193 | -0.00276 | -0.00842 | 0.001218 | -0.0005  | 0.001442 | 0.000793 |
| 0.003443 | 0.002302 | 0.000455 | -0.00003 | 0.001348 | 0.002053 | -0.00278 | -0.00013 | 0.000389 | 0.000018 | 0.002526 | 0.00088  | -0.00028 | .        |
| -0.00087 | -0.00229 | -0.00182 | -0.00211 | -0.00206 | -0.00296 | -0.00357 | 0.004615 | 0.002222 | -0.00469 | 0.002563 | -0.00141 | -0.00368 | 0.001288 |
| -0.00067 | 0.002029 | 0.000408 | 0.001189 | 0.000137 | 0.003232 | .        | .        | -0.00166 | .        | .        | -0.00015 | 0.00069  | 0.001554 |
| -0.00227 | -0.0007  | -0.00046 | -0.00017 | -0.00085 | -0.00031 | -0.00058 | 0.002274 | -0.00213 | 0.00162  | -0.00228 | -0.00163 | -0.00142 | -8.2E-05 |
| -0.00341 | -0.0016  | 0.0029   | -0.00016 | -4E-06   | -0.00182 | 0.004104 | 0.000356 | -0.00032 | 0.001736 | -0.00174 | -0.00263 | 0.00289  | .        |
| -0.00275 | 0.00088  | 0.010413 | 0.004303 | -0.00115 | -0.00257 | 0.003817 | -0.02712 | 0.000377 | 0.003056 | 0.001524 | -0.00073 | -0.00148 | -0.00046 |
| 0.003431 | 0.002106 | 0.001329 | 0.002562 | -0.00028 | 0.00108  | -0.00406 | -0.0056  | .        | -0.00402 | 0.001061 | 0.001552 | 0.003298 | 0.001479 |
| -0.00647 | 0.000475 | -0.00012 | 0.000506 | 0.002866 | -0.00091 | .        | .        | -0.00094 | .        | 0.004271 | .        | .        | .        |
| 0.000042 | -0.00063 | -0.0012  | -0.00065 | -0.00103 | -0.00014 | .        | -0.00158 | .        | .        | -0.00294 | -0.0009  | -0.00212 | -0.00085 |
| -0.00062 | -0.00037 | 0.000418 | 0.000479 | -0.00073 | .        | .        | .        | -0.00084 | .        | .        | .        | 0.003837 | 0.001642 |
| -0.00327 | -0.00405 | -0.00332 | -0.00288 | -0.00297 | -0.00234 | -0.00148 | -0.00028 | 0.00181  | 0.003248 | -0.00041 | -0.00621 | -0.00719 | -0.00273 |
| -0.00084 | 0.000818 | 0.001729 | 0.002617 | 0.000614 | 0.000426 | .        | .        | .        | -0.00072 | .        | 0.002644 | 0.001425 | 0.001986 |
| 0.000811 | -0.00023 | 0.000701 | -0.00028 | -0.00047 | 0.004164 | .        | 0.006977 | .        | .        | .        | 0.000886 | 0.002123 | 0.002681 |
| -0.00122 | .        | .        | 0.000665 | 0.001336 | 0.000714 | -0.00245 | 0.000025 | .        | .        | -0.00254 | -0.00114 | -0.00145 | -0.00142 |
| -0.00267 | 0.00071  | 0.000582 | 0.003456 | -0.00016 | -0.00234 | -0.00014 | .        | .        | .        | 0.000712 | -0.00016 | 0.000047 | -0.00092 |
| -0.0012  | .        | 0.002166 | 0.001677 | 0.001594 | -0.00049 | -0.00588 | -0.00408 | 0.000709 | -0.0002  | -0.00054 | 0.005057 | 0.002474 | 0.002104 |

| ch24     | ch25     | ch26     | ch27    | ch28    | ch29     | ch30     | ch31     | ch32     | ch33     | ch34     | ch35     | ch36     | ch37     |
|----------|----------|----------|---------|---------|----------|----------|----------|----------|----------|----------|----------|----------|----------|
| 0.230889 | 0.078948 | 0.096636 | -0.0527 | 0.11289 | 0.091098 | 0.079966 | 0.041384 | 0.223839 | 0.019163 | 0.128876 | 0.109886 | 0.068816 | 0.105087 |

|          |          |          |          |          |          |          |          |          |          |          |          |          |          |
|----------|----------|----------|----------|----------|----------|----------|----------|----------|----------|----------|----------|----------|----------|
|          | -0.03839 | 0.077966 | -0.1191  |          | 0.255215 | 0.59764  | 0.419705 | 0.654478 | 0.346786 | 0.305793 | 0.062705 | 0.03088  | -0.08926 |
|          | 0.32495  | 0.340448 | 0.284688 | 0.263874 | 0.275876 | 0.184313 | 0.136034 |          |          | 0.237703 | 0.3818   | 0.187471 | 0.22447  |
| 0.14092  | 0.111816 | 0.170057 | 0.212435 | 0.170104 | 0.177979 | 0.308101 | 0.353198 | 0.064011 |          |          | 0.16297  | 0.193794 | 0.294097 |
| 0.083122 |          | 0.248566 | 0.192658 | 0.235548 | 0.321177 | 0.237887 | 0.245355 | 0.347292 | 0.264025 | 0.206739 | 0.365253 | 0.317384 |          |
| 0.060946 | 0.039944 | 0.019877 | 0.067367 | 0.068461 | 0.103002 | 0.068289 | 0.034424 | 0.012882 | 0.02861  | 0.045083 | 0.135254 | 0.025987 | 0.070385 |
| -0.16693 | 0.354557 | 0.327023 | 0.183751 | 0.756733 | 0.209316 | 0.224998 | 0.229107 | 0.102409 | 0.161747 | 0.269248 | 0.111057 | 0.158566 | 0.124057 |
| -0.15005 | -0.13508 | -0.06326 | -0.04598 | 0.053348 | -0.03429 | -0.04509 | -0.06769 | -0.02538 | -0.15064 | 0.036855 | -0.03822 | 0.082025 | 0.005787 |
| 0.083578 | 0.078286 | 0.123516 | 0.064568 | 0.193747 | 0.070019 | 0.207523 | 0.090804 | 0.229832 | 0.094788 | 0.11848  | 0.260049 | 0.193946 |          |
| 0.101994 | 0.101132 | 0.044571 | 0.120399 | 0.136022 | 0.027342 | 0.284043 | 0.166154 | 0.004607 | -0.34556 | 0.210841 | 0.137119 | 0.119133 | 0.171448 |
| 0.036946 | 0.140348 | 0.225971 | 0.218447 | 0.161059 | 0.13227  |          |          | 0.174356 |          |          | 0.135766 | 0.164511 | 0.256213 |
| -0.07127 | 0.003642 | -0.0101  | -0.00927 | -0.00321 | -0.06581 | 0.029528 | -0.09053 | -0.03954 | 0.024666 | 0.158003 | -0.1082  | -0.07224 | -0.07366 |
| 0.150357 | 0.057371 | 0.069569 | 0.036767 | 0.076313 | 0.292623 | 0.470837 | 0.123229 | 0.221929 | 0.16635  | 0.351722 | 0.258394 | -0.00437 |          |
| 0.146619 | 0.057614 | 0.128423 | 0.084437 | 0.137177 | 0.128613 | 0.320484 | 0.200669 | 0.385464 | 0.48397  | 0.736082 | 0.097564 | 0.084773 | -0.00967 |
| 0.027809 | -0.00946 | 0.051153 | 0.033873 | 0.013852 | 0.062055 | 0.283888 | 0.173786 |          | 0.114882 | 0.125264 | -0.01339 | 0.05066  | 0.086946 |
| 0.262631 | 0.078262 | -0.08702 | 0.078968 | 0.122096 | -0.04775 |          |          | 0.198424 |          | 0.267556 |          |          |          |
| 0.099194 | -0.02061 | -0.00794 | 0.17718  | 0.067203 | -0.1042  |          | 0.062181 |          |          | 0.206332 | 0.007188 | -0.13204 | -0.1056  |
| 0.096368 | 0.034479 | 0.045683 | 0.05556  | 0.052357 |          |          |          | 0.044009 |          |          |          | 0.024194 | 0.110973 |
| -0.14618 | -0.06047 | -0.11059 | -0.04106 | 0.006264 | -0.11643 | -0.04574 | -0.05459 | 0.035827 | 0.059835 | -0.0255  | -0.15001 | -0.30268 | -0.16577 |
| 0.059647 | -0.02756 | -0.08066 | -0.02943 | -0.07032 | 0.052849 |          |          |          | 0.199908 |          | 0.218977 | -0.0423  | 0.052048 |
| 0.091008 | 0.084732 | 0.034547 | 0.031501 | 0.092449 | 0.176758 |          | 0.081249 |          |          |          | 0.081664 | -0.02919 | -0.02514 |
| -0.00413 |          |          | 0.136849 | 0.20768  | 0.144989 | 0.133588 | 0.10837  |          |          | 0.059874 | -0.1436  | -0.0046  | 0.046974 |
| -0.10439 | -0.04842 | 0.016222 | 0.077371 | -0.05322 | -0.10601 | 0.155934 |          |          |          | -0.10235 | -0.10399 | -0.10887 | -0.14225 |
| -0.24555 |          | -0.05097 | -0.00087 | 0.054243 | -0.00663 | -0.18362 | -0.09967 | -0.14568 | -0.10643 | -0.05475 | -0.0408  | -0.07361 | -0.02102 |

| ch24     | ch25     | ch26     | ch27     | ch28     | ch29     | ch30     | ch31     | ch32     | ch33     | ch34     | ch35     | ch36     | ch37     |
|----------|----------|----------|----------|----------|----------|----------|----------|----------|----------|----------|----------|----------|----------|
| 0.000182 | -0.00103 | 0.000778 | 0.001845 | -0.00083 | 0.00058  | -0.00124 | -0.00032 | 0.001742 | -0.00371 |          | 0.00053  | -0.00334 | 0.003265 |
| -0.00261 | -0.00197 | -0.0003  | -0.00167 | -0.00163 | -0.0007  |          | 0.002914 | -0.00245 | 0.00165  | -0.0046  | -0.00355 | -0.00105 | -0.00014 |
| 0.003346 | 0.007331 | 0.005742 | 0.006028 | 0.005808 | 0.005935 | 0.00033  | 0.003552 | 0.010662 |          | 0.003626 | 0.007988 | 0.007566 | 0.007243 |
|          |          |          | -0.00128 | 0.000629 | 0.001678 | -0.0015  | 0.001764 | 0.000442 | 0.000389 | -0.00121 | 0.001824 |          | -0.00146 |
| -0.00128 | -0.00015 | 0.001514 | 0.000887 | -0.00014 | -0.00062 | -0.00091 | -0.0006  | -0.00171 |          | 0.003982 | -0.00121 | 0.001818 | 0.002668 |
| 0.000175 | 0.000665 | 0.000308 | -0.00094 | 0.000763 | 0.000046 | -0.00278 | 0.001777 | -0.00125 |          | -0.00084 | -0.00032 | 0.000145 | -0.00026 |
| -0.00367 | 0.001766 | 0.001918 | 0.000697 | 0.000598 | 0.002046 | 0.004079 | 0.001634 | 0.004729 |          | 0.003635 | 0.000704 | 0.000812 | 0.001918 |
| -0.00202 | -0.00215 | -0.00126 | 0.001711 | 0.000208 | -0.00668 |          | -0.00031 | -0.00406 | -0.00616 | -0.0037  | -0.00201 | -0.00489 | -0.00082 |
| -0.00142 | -0.00079 | -0.00116 | 0.000236 | -0.0009  | -0.00063 |          | 0.006062 | 0.001321 | 0.004343 | 0.003397 | -0.00114 | -0.0005  | -0.00092 |
| 0.001438 | 0.000826 | -0.00151 | -0.00121 | -0.00163 | -0.0004  |          |          | 0.002174 | 0.008416 | 0.001765 | 0.000422 | 0.001261 | 0.002124 |

|          |          |          |          |          |          |          |          |          |          |          |          |          |          |
|----------|----------|----------|----------|----------|----------|----------|----------|----------|----------|----------|----------|----------|----------|
| 0.005216 | 0.001178 | 0.001805 | 0.000975 | 0.001171 | 0.001992 | 0.002313 | 0.005776 | 0.003298 | -0.00134 | -0.01355 | 0.002024 | -0.00099 | -0.00202 |
| -0.00082 | 0.000764 | 0.001091 | 0.000068 | -0.00025 | -0.00091 |          | -0.00094 | -0.00143 | 0.000588 | -0.00355 | -0.00329 | -0.00095 | -0.00114 |
| 0.003226 | 0.002678 | 0.004131 | 0.002855 | 0.003156 | 0.005489 | -0.0076  | -0.00001 | -0.00016 | 0.004508 | 0.001496 | 0.003057 | 0.004479 | 0.005232 |
| -0.0007  | 0.00018  | 0.003462 | 0.002931 | 0.001271 | -0.00125 | -0.00048 | -1.1E-05 | -0.00232 | 0.00425  |          | 0.001147 | 0.00215  |          |
| -8.6E-05 | 0.002287 | 0.000923 | 0.000811 | -0.00161 | -0.00258 | -0.00288 | 0.001767 |          |          | -0.00035 | -0.00129 | 0.000431 | 0.001355 |

| ch24     | ch25     | ch26     | ch27     | ch28     | ch29     | ch30     | ch31     | ch32     | ch33     | ch34     | ch35     | ch36     | ch37     |
|----------|----------|----------|----------|----------|----------|----------|----------|----------|----------|----------|----------|----------|----------|
| 0.132043 | 0.107062 | 0.009069 | -0.07051 | 0.181779 | 0.405783 | 0.061521 | 0.063274 | 0.153702 | 0.118548 |          | 0.29213  | 0.122633 | 0.215488 |
| 0.034522 | 0.236953 | 0.044736 | 0.07288  | 0.225058 | 0.309287 |          | 0.371738 | 0.142668 | 0.256416 | 0.239801 | 0.272267 | 0.199775 | 0.134927 |
| 0.167765 | 0.108753 | 0.165699 | -0.14448 | 0.193984 | 0.227501 | 0.190773 | 0.100348 | 0.715116 |          | 0.423396 | -0.03417 | 0.306969 | 0.207029 |
|          |          |          | 0.182128 | 0.30668  | 0.260663 | 0.113888 | 0.255852 | 0.060654 | 0.122299 | 0.14609  | 0.418671 |          | 0.386612 |
| 0.179094 | 0.173484 | 0.265755 | 0.2905   | 0.30296  | 0.289079 | 0.527264 | 0.4644   | 0.191513 |          | 0.166987 | 0.288476 | 0.318217 | 0.553453 |
| 0.205051 | 0.182512 | 0.202415 | 0.153313 | 0.151567 | 0.131645 | 0.133081 | 0.092807 | 0.141875 |          | 0.23792  | 0.217237 | 0.260039 | 0.198487 |
| -0.03828 | 0.218999 | 0.218867 | 0.177419 | 0.279858 | 0.207559 | 0.267391 | 0.040589 | 0.218678 |          | 0.418651 | 0.290518 | 0.207562 | 0.188182 |
| 0.02594  | 0.042005 | 0.104897 | 0.152838 | 0.126402 | -0.06065 |          | 0.074477 | 0.182919 | 0.129539 | 0.196418 | -0.02389 | 0.001512 | 0.128136 |
| 0.213244 | -0.01832 | 0.123978 | 0.237182 | 0.052495 | 0.332674 |          | 0.167663 | 0.056968 | -0.27902 | 0.22509  | 0.178551 | 0.114167 | -0.07902 |
| 0.061791 | 0.14178  | 0.06338  | 0.046528 | 0.099059 | -0.10106 |          |          | 0.150124 | 0.124346 | 0.087562 | 0.141383 | 0.143859 | 0.185547 |
| 0.210986 | 0.245788 | 0.179788 | 0.175037 | 0.163825 | 0.270197 | 0.156071 | 0.240932 | 0.067479 | 0.207606 | 0.117031 | 0.211239 | 0.070779 | 0.256197 |
| 0.225931 | 0.070331 | 0.091642 | 0.064135 | 0.041816 | 0.192174 |          | 0.126988 | 0.196496 | 0.202489 | 0.300831 | 0.211051 | 0.110492 | 0.090423 |
| 0.084036 | 0.114433 | 0.057452 | 0.05924  | 0.131545 | 0.089709 | 0.075335 | 0.129556 | 0.212174 | 0.09523  | -0.00214 | 0.193425 | 0.100215 | 0.095412 |
| 0.146684 | 0.207127 | 0.164928 | 0.248437 | 0.18242  | 0.162019 | 0.092895 | 0.080413 | 0.211829 | 0.47945  |          | 0.280739 | 0.264667 |          |
| -0.02771 | -0.12567 | -0.08104 | -0.09608 | -0.08585 | 0.038341 | -0.06088 | -0.08391 |          |          | 0.104919 | -0.07226 | -0.13087 | -0.09534 |



| ch38     | ch39     | ch40     | ch41     | ch42     | ch43     | ch44     | ch45     | ch46     | ch47     | ch48     | ch49     | ch50     | ch51     |
|----------|----------|----------|----------|----------|----------|----------|----------|----------|----------|----------|----------|----------|----------|
| -0.00054 | -0.00318 | 0.010582 | 0.007957 | 0.001931 |          | 0.004452 | 0.007285 | -0.00166 | -0.00107 | -0.00088 | -0.00142 | 0.000918 | 0.002565 |
| 0.00179  |          | 0.002071 |          | -0.00129 |          | -0.00149 | 0.003332 | 0.001069 | 0.00105  | 0.000756 | 0.002266 | 0.000994 | -0.0011  |
| -0.00017 | 0.008295 | -0.00127 | -0.01549 | -0.01356 | -0.01607 |          | -0.0177  | 0.003847 | 0.001089 | -0.00122 | -0.00021 | 0.004083 |          |
| 0.002029 | 0.000992 | 0.000851 |          | 0.002334 |          |          | 0.003564 | 0.002265 |          |          | 0.001429 | -9.8E-05 |          |
| 0.002124 | 0.001566 | 0.001575 | 0.000872 | 0.000061 | -0.00092 | -0.00687 |          | 0.00198  |          |          | 0.002706 | 0.000135 | -0.00351 |
| -0.00187 | 0.001084 | 0.002234 | -0.001   | 0.000774 | 0.000475 |          | 0.002632 | 0.003221 | 0.000231 | -0.00082 | 0.002558 | 0.001299 | -0.00025 |
| -0.0021  | -0.00269 | -0.00451 | -0.00302 | -0.00216 | -0.00302 | -0.00315 | -0.00124 | -0.00163 | -0.00429 | -0.00217 | -0.00219 | 0.001858 | -0.00273 |
| -0.00034 | 0.002041 | 0.002413 | -0.00631 | 0.000847 | -0.00283 | -0.00391 | 0.000238 | -0.0001  | 0.000131 | -4E-06   | 0.00053  | 0.001112 | -0.00424 |
| 0.001831 | 0.001363 | 0.001541 | 0.002309 | -0.00421 | -0.00036 | 0.000461 | -0.00184 | -0.00019 |          |          | 0.00146  | 0.000263 | 0.002082 |
| -0.00248 | -0.00076 | 0.001507 | 0.000548 | 0.004661 | -0.00141 | 0.005458 | 0.000406 | -0.00097 | -0.00089 | -0.00118 | -0.00041 | -0.0017  |          |
| -0.00067 | 0.000136 | 0.001975 |          |          |          |          | -0.0027  | -0.00182 | 0.000262 | 0.000576 | -0.00018 | 0.000178 |          |
| -0.0006  | -0.00061 | -0.00117 | -0.00067 | 0.000777 | -0.00217 | -0.00193 | -0.00142 | -0.00153 | -0.00181 | -0.00169 | -0.00145 | -0.00015 | -0.00015 |
| 0.001087 | 0.00057  | 0.003713 | 0.002327 | -0.00338 |          |          | -0.00204 | 0.000117 | -0.0007  |          | 0.001363 | 0.001482 |          |
| -0.00096 | -0.00685 | -0.00057 | 0.002558 |          | 0.005221 | -0.00215 | 0.00367  | 0.001047 | -0.00086 | -0.00345 | -0.0015  | -0.00086 |          |
| 0.006058 | -0.00043 | 0.002322 | -0.00211 | -0.00107 | -0.00657 | 0.001851 | 0.003787 | 0.001793 | 0.000868 | -0.00125 |          |          | 0.001382 |
|          |          |          |          | -0.00623 | -0.00284 |          |          |          | -0.00036 | -4.1E-05 |          |          |          |
| -0.00163 | -0.00209 | -0.00349 | -0.00345 | -0.00263 | 0.00133  | -0.00205 |          | -0.0001  | -0.0012  | -0.0029  | -0.00122 | -0.00201 |          |
| 0.003155 |          |          |          |          |          |          |          |          | 0.002023 | 0.00019  | 0.001495 | -0.00026 |          |
| -0.00798 | -0.00427 | -0.00234 | 0.003934 | -0.00024 | -0.00069 | -0.00267 | -0.00439 | -0.00571 | 0.000229 |          |          | -0.00372 | -0.00146 |
| 0.0011   | 0.002355 |          |          |          |          |          | -0.00129 | 0.001827 | 0.000731 | 0.000653 | 0.002124 |          |          |
|          | 0.001653 |          |          | 0.012556 |          |          |          | 0.002148 | 0.004829 | 0.000953 | -0.00047 | 0.007013 |          |
| -0.00259 | -0.00151 | 0.000062 | 0.008988 | -0.00555 |          |          | -0.00459 | -0.00214 | 0.000867 | 0.000955 | -0.00387 | -0.00253 |          |
| 0.000264 | -0.00176 | -0.00015 |          |          | 0.001257 | -0.00273 | 0.000959 | 0.000843 | -0.00289 | -0.00364 | 0.000372 | 0.001046 |          |
| 0.004285 | 0.001016 | -0.00071 | 0.001745 | -0.00106 | 0.001914 | -0.00123 |          | 0.005153 |          |          | 0.00252  | 0.002236 | -0.0041  |

| ch38     | ch39     | ch40     | ch41     | ch42    | ch43 | ch44     | ch45    | ch46     | ch47     | ch48     | ch49     | ch50     | ch51     |
|----------|----------|----------|----------|---------|------|----------|---------|----------|----------|----------|----------|----------|----------|
| 0.053411 | 0.198482 | 0.035847 | -0.10738 | 0.12979 |      | -0.14839 | 0.08136 | 0.158098 | 0.176512 | 0.124654 | 0.090063 | 0.043582 | -0.23183 |

|          |          |          |          |          |          |          |          |          |          |          |          |          |          |
|----------|----------|----------|----------|----------|----------|----------|----------|----------|----------|----------|----------|----------|----------|
| 0.063561 |          | 0.51546  |          | 0.759087 |          | 0.243804 | 0.29378  | 0.161995 | 0.058657 | 0.021846 | 0.176738 | 0.325323 | 0.419855 |
| 0.095938 | 0.361291 | 0.317108 | 0.099412 | 0.077868 | 0.299308 |          | 0.354803 | 0.382103 | 0.276673 | 0.202128 | 0.151367 | 0.389458 |          |
| 0.226019 | 0.203282 | 0.131984 |          | 0.240856 |          |          | 0.355412 | 0.263208 |          |          | 0.309253 | 0.250121 |          |
| 0.196901 | 0.244553 | 0.274979 | 0.268102 | 0.215483 | 0.213472 | 0.164532 |          | 0.230567 |          |          | 0.257842 | 0.226525 | 0.336927 |
| 0.138778 | 0.18859  | 0.086322 | 0.027313 | 0.052599 | 0.0422   |          | 0.107074 | 0.123    | 0.050663 | 0.096723 | 0.207331 | 0.142719 | 0.044329 |
| 0.136407 | 0.182435 | 0.277493 | 0.19972  | 0.247291 | 0.116195 | 0.261642 | 0.417301 | 0.163942 | 0.173004 | 0.149375 | 0.252037 | 0.399584 | 0.264602 |
| 0.041908 | 0.132723 | 0.034004 | -0.11995 | -0.04221 | 0.038773 | 0.0241   | 0.064457 | 0.049664 | -0.00361 | -0.0271  | -0.00528 | 0.066259 | 0.064764 |
| 0.293448 | 0.316065 | 0.312    | 0.080377 | 0.295185 | 0.108597 | 0.214546 | 0.199188 | 0.307879 |          |          | 0.381148 | 0.274439 | 0.359223 |
| 0.088333 | 0.263051 | -0.01893 | 0.180333 | 0.125465 | -0.04184 | 0.082353 | 0.241007 | 0.135746 | 0.146658 | 0.138409 | 0.187357 | 0.168114 |          |
| 0.18872  | 0.219949 | 0.134819 |          |          |          |          | 0.094219 | 0.02914  | 0.181056 | 0.201791 | 0.126182 | 0.169897 |          |
| -0.03424 | -0.01618 | 0.297595 | 0.228543 | 0.082135 | 0.040541 | 0.086428 | 0.075245 | -0.02721 | -0.01528 | 0.188791 | 0.010639 | 0.103515 | 0.449963 |
| 0.014568 | 0.114881 | 0.44646  | 0.300424 | 0.277886 |          |          | 0.363834 | 0.101112 | 0.395835 |          | 0.209121 | 0.281679 |          |
| -0.02319 | 0.025987 | 0.290566 | 0.231631 |          | 0.502111 | 0.490025 | 0.507436 | 0.151282 | 0.043821 | 0.010546 | 0.039986 | 0.220045 |          |
| 0.086108 | -0.06154 | 0.106158 | 0.246798 | 0.065234 | 0.085513 | 0.151019 | 0.131773 | 0.124175 | 0.035384 | 0.112033 |          |          | 0.186538 |
|          |          |          |          | 0.163975 | 0.121764 |          |          |          | 0.014003 | 0.011158 |          |          |          |
| 0.045718 | -0.01505 | -0.08532 | 0.0125   | 0.061358 | 0.30008  | 0.278409 |          | -0.07228 | -0.10451 | 0.007206 | -0.11076 | -0.08021 |          |
| 0.064622 |          |          |          |          |          |          |          |          | 0.099365 | 0.052138 | 0.099989 | 0.067723 |          |
| -0.13263 | -0.08298 | -0.07098 | 0.235199 | -0.00289 | 0.050489 | -0.06591 | -0.04245 | -0.1664  | -0.0605  |          |          | 0.013758 | 0.059392 |
| 0.184077 | 0.13662  |          |          |          |          |          | 0.070798 | 0.281591 | -0.07964 | 0.072491 | 0.500299 |          |          |
|          | 0.15984  |          |          | 0.175254 |          |          |          | 0.17378  | 0.0696   | 0.088956 | 0.141481 | 0.167361 |          |
| 0.004672 | 0.041897 | 0.104388 | 0.066144 | -0.08937 |          |          | -0.21319 | 0.066022 | 0.007597 | -0.05366 | -0.05885 | 0.034208 |          |
| -0.106   | -0.12448 | 0.008123 |          |          | 0.25754  | 0.338698 | 0.147583 | 0.013591 | -0.00143 | -0.02008 | -0.05601 | 0.095049 |          |
| 0.061583 | 0.010122 | -0.06653 | 0.166343 | 0.026391 | -0.14308 | -0.13238 |          | 0.023623 |          |          | 0.054072 | 0.030202 | -0.16424 |

| ch38     | ch39     | ch40     | ch41     | ch42     | ch43     | ch44     | ch45     | ch46     | ch47     | ch48     | ch49     | ch50     | ch51     |
|----------|----------|----------|----------|----------|----------|----------|----------|----------|----------|----------|----------|----------|----------|
| -0.00072 |          | -0.00568 | -0.00138 | 0.00019  | -0.00298 |          |          | 0.000899 | -0.00027 | 0.000167 | -0.00029 | -0.00112 |          |
| -0.0037  |          | -0.00248 | -0.00114 | -0.00165 | -0.00345 | -0.00244 | -0.00286 | -0.00283 | -0.00237 | -0.00223 | -0.00182 | -0.00313 | -0.00696 |
|          | 0.005089 | 0.003883 | 0.006225 | 0.002794 | 0.015078 | 0.002501 | 0.005754 | 0.008339 | 0.01035  | 0.004145 | 0.005156 | 0.008972 | 0.017442 |
| -0.00233 | -0.00087 | -0.001   | -0.00097 | -0.00066 | -0.00016 | -0.00076 | -0.00146 | -0.00029 | 0.000159 | 0.000478 | 0.000981 | 0.001048 | -0.00194 |
| 0.000824 | 0.00025  | 0.002802 | 0.002066 | -5E-06   | 0.004244 |          |          | 0.001753 | 0.002653 | 0.001402 | 0.000745 | 0.003407 | 0.000752 |
| 0.000136 | 0.00087  | -4.8E-05 | 0.000386 | -6.8E-05 | 0.000135 | -0.00219 | -0.00118 | 0.000016 | 0.000069 | 0.000595 | 0.000161 | 0.001127 | -0.00041 |
| -0.00615 | 0.001689 | 0.000319 | 0.004301 | 0.002945 | 0.005469 |          | 0.007471 | 0.001692 | -0.00093 | -0.00225 | 0.001258 | 0.00281  | 0.009618 |
| -0.00204 | -0.0021  | -0.00038 | -0.00058 | -0.00745 | -0.00722 | -0.00543 | -0.00533 | -0.00374 | -0.0086  | -0.00714 | -0.00246 |          |          |
| 0.000757 | -3.6E-05 |          | 0.00915  | 0.008743 | 0.004399 | 0.004007 | 0.005889 | -0.00073 | -0.00086 | -4.9E-05 | -0.00037 | 0.004908 | 0.010962 |
| 0.000653 | -0.00254 | 0.002801 | 0.013002 |          |          |          | 0.000542 | 0.001084 | 0.003695 | 0.001206 | 0.000045 | 0.003791 | 0.016147 |

|          |          |          |          |          |          |          |          |          |          |          |          |          |          |  |
|----------|----------|----------|----------|----------|----------|----------|----------|----------|----------|----------|----------|----------|----------|--|
| 0.000821 | 0.000974 | 0.000549 | -0.01073 | 0.002746 | 0.001827 |          |          |          | 0.001443 | -0.00323 | -0.0032  | -0.00094 | 0.005277 |  |
| -0.00195 | -0.00128 | -0.00053 | -0.00089 | -0.00156 | 0.00388  | -0.0021  | 0.000408 | -0.00144 | -0.00084 | -0.00175 | -0.0024  | -0.00203 | 0.000993 |  |
| 0.00357  | 0.005153 | 0.001837 | 0.002741 |          | 0.003667 |          | 0.003041 | 0.008748 | 0.005984 | 0.003375 | 0.004057 | 0.002165 |          |  |
| 0.001335 | 0.00257  | -0.00138 | -0.00106 | 0.000122 | 0.004239 | 0.007374 | 0.002676 | 0.003907 |          | 0.000629 | 0.002115 | 0.000208 |          |  |
| -0.00196 | -0.00047 | -0.00505 | -0.00525 | -0.00194 | -0.00837 | -0.00419 | -0.0005  | -0.00139 | 0.005761 | 0.002313 | -0.00156 | -0.00082 | -0.00661 |  |

| ch38     | ch39     | ch40     | ch41     | ch42     | ch43     | ch44     | ch45     | ch46     | ch47     | ch48     | ch49     | ch50     | ch51     |
|----------|----------|----------|----------|----------|----------|----------|----------|----------|----------|----------|----------|----------|----------|
| 0.139194 |          | 0.056715 | -0.04402 | 0.099042 | 0.167902 |          |          | 0.150302 | 0.188548 | 0.108217 | 0.147061 | -0.03084 |          |
| 0.223692 |          | 0.303502 | 0.248658 | 0.266148 | 0.272088 | 0.379215 | 0.398151 | 0.267625 | 0.107319 | 0.166053 | 0.38251  | 0.478998 | 0.32429  |
|          | 0.572709 | 0.197289 | 0.229921 | 0.244539 | 0.738505 | 0.274231 | 0.062847 | 0.191967 | 0.397212 | 0.482792 | 0.166283 | 0.239608 | 0.208616 |
| 0.279659 | 0.357908 | 0.204493 | 0.255884 | 0.312385 | -0.03204 | 0.125815 | 0.304635 | 0.415975 | 0.374417 | 0.29152  | 0.339426 | 0.284109 | 0.230902 |
| 0.412124 | 0.286752 | 0.221824 | 0.406627 | 0.282239 | 0.311832 |          |          | 0.387732 | 0.484323 | 0.417963 | 0.336303 | 0.255063 | 0.262448 |
| 0.194126 | 0.130144 | 0.149586 | 0.087207 | 0.114223 | 0.230437 | 0.24451  | 0.276108 | 0.256223 | 0.24851  | 0.163011 | 0.182144 | 0.226637 | 0.168125 |
| 0.290119 | 0.377206 | 0.608886 | 0.525882 | 0.181239 | 0.569423 |          | 0.541285 | 0.36088  | 0.313619 | 0.338708 | 0.210634 | 0.512369 | 0.950232 |
| 0.14874  | -0.02622 | 0.166472 | 0.154957 | 0.042089 | 0.204143 | 0.245693 | 0.13518  | -0.05965 | -0.00014 | 0.056611 | 0.03239  |          |          |
| 0.170904 | 0.145687 |          | 0.337794 | 0.227222 | 0.005764 | 0.283328 | 0.186359 | 0.166445 | 0.07291  | 0.085327 | 0.150756 | 0.403485 | 0.751564 |
| 0.099393 | 0.081865 | 0.091293 | 0.342387 |          |          |          | 0.239104 | 0.128997 | 0.20618  | 0.242395 | 0.218958 | 0.157721 | 0.328764 |
| 0.206839 | 0.176738 | 0.196912 | 0.11022  | 0.245976 | 0.143166 |          |          | 0.081465 | 0.105412 | 0.335423 | 0.142659 | 0.296427 |          |
| 0.083783 | 0.154223 | 0.293759 | 0.286406 | 0.197892 | 0.274177 | 0.412441 | 0.42552  | 0.137108 | 0.176787 | 0.128903 | 0.1434   | 0.255946 | 0.455985 |
| 0.035269 | 0.191671 | 0.009844 | 0.05916  |          | 0.109313 |          | 0.115447 | 0.140616 | 0.176231 | 0.137546 | 0.145131 | 0.148724 |          |
| 0.385279 | 0.205693 | 0.129725 | 0.115419 | 0.108826 | 0.669747 | 0.696545 | 0.524504 | 0.438118 |          | 0.128656 | 0.30831  | 0.139555 |          |
| -0.11844 | 0.015084 | 0.121728 | -0.01798 | 0.027491 | -0.29823 | 0.267    | 0.022045 | -0.12801 | -0.16456 | -0.20936 | -0.01614 | 0.087985 | 0.116011 |





ch52

0.008369  
0.000495  
0.009173

.  
-0.00185  
-0.00042  
-0.00217  
-0.01457  
0.00326  
-0.00452  
-0.00427  
-0.0002

.  
0.00102  
0.000125  
-0.01234  
-0.00224

.  
0.001822

.  
0.012108

.  
-0.00349

ch52

-0.06933

0.684023  
0.250766

.  
0.127343  
0.062255  
0.408377  
0.081006  
0.260261  
0.154721  
0.140605  
0.319049

.  
0.295961  
0.076409  
0.163553  
0.080878

.  
0.146267

.  
-0.20812

.  
0.05664

ch52

0.002034  
-0.00256  
0.010841  
0.000084  
0.00237  
-0.00104  
0.004986  
-0.00319  
0.005407  
0.004485

.  
-0.00097

.  
-0.00191  
-0.00551

ch52

0.051498  
0.130019  
0.199337  
0.223015  
0.23431  
0.142834  
0.58217  
0.102724  
0.299286  
0.470771

.  
0.317542

.  
0.133781  
0.067721
